# Supplementary material
Source: publisher figshare collection journal article supplement (https://tandf.figshare.com/ndownloader/files/14078288)
Supplement: Supplementary file 1 [file 14078288]

**Supplementary Material**

**Reliable structural information for rational design of benzoxazole type potential cholesteryl ester transfer protein (CETP) inhibitors through multiple validated modelling techniques**

Sk. Abdul Amina, Nilanjan Adhikaria, #, Shovanlal Gayenb,* and Tarun Jhaa,*

aNatural Science Laboratory, Division of Medicinal and Pharmaceutical Chemistry, Department of Pharmaceutical Technology, P. O. Box 17020, Jadavpur University, Kolkata 700032, West Bengal, India

bLaboratory of Drug Design and Discovery, Department of Pharmaceutical Sciences, Dr. Harisingh Gour University, Sagar 470003, Madhya Pradesh, India

Email IDs:

S. A. Amin: pharmacist.amin@gmail.com

N. Adhikari: nilanjan_juphar@rediffmail.com

S. Gayen: shovanlal.gayen@gmail.com

T. Jha: tjupharm@yahoo.com

#Present address: School of Pharmaceutical Technology, ADAMAS University, Barasat-Barrackpore Road, P. O. Jagannathpur, Kolkata – 700126, West Bengal, India.

*Correspondence should be addressed to shovanlal.gayen@gmail.com (S. Gayen) and: tjupharm@yahoo.com (T. Jha).

**Supplementary Table 1** List of CETP inhibitors used in QSAR studies

| **Cpda** | **R1** | **R2** | **R3** | **R4** | **Ar/R** | **X** | **Y** | **IC50 (μM)** | ***pIC50*** |
| --- | --- | --- | --- | --- | --- | --- | --- | --- | --- |
| **1** | H | H | H | H | 2-MePh | O | CO | 13.000 | 4.886 |
| **2** | H | Cl | H | H | 2-MePh | O | CO | 1.100 | 5.959 |
| **3** | H | H | H | Cl | 2-MePh | O | CO | 21.000 | 4.678 |
| **4** | Me | H | H | H | 2-MePh | O | CO | 23.000 | 4.638 |
| **5** | H | Me | H | H | 2-MePh | O | CO | 2.000 | 5.699 |
| **6** | H | NO2 | H | H | 2-MePh | O | CO | 0.940 | 6.027 |
| **7** | H | H | NO2 | H | 2-MePh | O | CO | 3.200 | 5.495 |
| **8** | H | F | H | H | 2-MePh | O | CO | 1.900 | 5.721 |
| **9** | H | H | F | H | 2-MePh | O | CO | 7.500 | 5.125 |
| **10** | H | CN | H | H | 2-MePh | O | CO | 0.130 | 6.886 |
| **11** | H | H | CN | H | 2-MePh | O | CO | 0.410 | 6.387 |
| **12** | H | H | H | CN | 2-MePh | O | CO | 5.200 | 5.284 |
| **13** | H | Br | H | H | 2-MePh | O | CO | 1.300 | 5.886 |
| **14** | H | OMe | H | H | 2-MePh | O | CO | 0.840 | 6.076 |
| **15** | H | SMe | H | H | 2-MePh | O | CO | 2.900 | 5.538 |
| **16** | H | COMe | H | H | 2-MePh | O | CO | 1.300 | 5.886 |
| **17** | H | CH(OH)Me | H | H | 2-MePh | O | CO | 3.400 | 5.469 |
| **18** | H | Vinyl | H | H | 2-MePh | O | CO | 2.800 | 5.553 |
| **19** | H | Ethynyl | H | H | 2-MePh | O | CO | 2.000 | 5.699 |
| **20** | H | CN | H | H | 2-MePh | O | CO | 38.000 | 4.420 |
| **21** | H | CN | Me | H | 2-MePh | O | CO | 1.900 | 5.721 |
| **22** | H | Br | H | Me | 2-MePh | O | CO | 0.510 | 6.292 |
| **23** | H | CN | H | Me | 2-MePh | O | CO | 0.060 | 7.222 |
| **24** | H | CN | H | CN | 2-MePh | O | CO | 0.270 | 6.569 |
| **25** | H | Cl | H | NO2 | 2-MePh | O | CO | 0.570 | 6.244 |
| **26** | H | Br | H | F | 2-MePh | O | CO | 0.910 | 6.041 |
| **27** | H | CN | H | F | 2-MePh | O | CO | 0.062 | 7.208 |
| **28** | H | Br | H | COMe | 2-MePh | O | CO | 0.380 | 6.420 |
| **29** | H | CN | H | COMe | 2-MePh | O | CO | 0.086 | 7.066 |
| **30** | H | Br | H | CH(Me)OH | 2-MePh | O | CO | 0.059 | 7.229 |
| **31** | H | CN | H | CH(Me)OH | 2-MePh | O | CO | 0.046 | 7.337 |
| **32** | H | Br | H | C(Me)2OH | 2-MePh | O | CO | 0.044 | 7.357 |
| **33** | H | CN | H | C(Me)2OH | 2-MePh | O | CO | 0.028 | 7.553 |
| **34** | H | Br | H | C(Me)(Et)OH | 2-MePh | O | CO | 0.110 | 6.959 |
| **35** | H | CN | H | C(Me)(Et)OH | 2-MePh | O | CO | 0.031 | 7.509 |
| **36** | H | Br | H | C(Me)(n-Pr)OH | 2-MePh | O | CO | 0.200 | 6.699 |
| **37** | H | CN | H | C(Me)(n-Pr)OH | 2-MePh | O | CO | 0.058 | 7.237 |
| **38** | H | Br | H | C(Me)(i-Pr)OH | 2-MePh | O | CO | 0.210 | 6.678 |
| **39** | H | CN | H | C(Me)(i-Pr)OH | 2-MePh | O | CO | 0.080 | 7.097 |
| **40** | H | Br | H | C(Me)(Ethynyl)OH | 2-MePh | O | CO | 0.094 | 7.027 |
| **41** | H | Br | H | C(Me)(1-Propynyl)OH | 2-MePh | O | CO | 0.210 | 6.678 |
| **42** | H | CN | H | C(Me)(1-Propynyl)OH | 2-MePh | O | CO | 0.160 | 6.796 |
| **43** | H | H | H | C(Me)2OH | 2-MePh | O | CO | 0.440 | 6.357 |
| **44** | H | CN | H | i-Pr | 2-O-i-Pr,5-FPh-(2-Pyr) | CH | CONHCH2 | 0.013 | 7.886 |
| **45** | H | Cl | H | H | 2-MePh | O | CO | 19.310 | 4.714 |
| **46** | H | Cl | H | H | H | O | CO | 4.230 | 5.374 |
| **47** | H | Cl | H | H | 2-EtPh | O | CO | 2.587 | 5.587 |
| **48** | H | Cl | H | H | 2-PrPh | O | CO | 2.700 | 5.569 |
| **49** | H | Cl | H | H | 2-CF3Ph | O | CO | 6.390 | 5.194 |
| **50** | H | Cl | H | H | 2-ClPh | O | CO | 2.150 | 5.668 |
| **51** | H | Cl | H | H | 2-NO2Ph | O | CO | 4.396 | 5.357 |
| **52** | H | Cl | H | H | 3-CF3Ph | O | CO | 1.773 | 5.751 |
| **53** | H | Cl | H | H | 3-ClPh | O | CO | 1.248 | 5.904 |
| **54** | H | Cl | H | H | 3-FPh | O | CO | 1.994 | 5.700 |
| **55** | H | Cl | H | H | 3-OMePh | O | CO | 12.880 | 4.890 |
| **56** | H | Cl | H | H | 3-NO2Ph | O | CO | 26.490 | 4.577 |
| **57** | H | Cl | H | H | 4-CF3Ph | O | CO | 0.810 | 6.092 |
| **58** | H | Cl | H | H | 4-ClPh | O | CO | 6.810 | 5.167 |
| **59** | H | Cl | H | H | 4-FPh | O | CO | 1.774 | 5.751 |
| **60** | H | Cl | H | H | 4-OMePh | O | CO | 4.570 | 5.340 |
| **61** | H | Cl | H | H | 4-NO2Ph | O | CO | 2.206 | 5.656 |
| **62** | H | Cl | H | H | H | NH | CO | 8.132 | 5.090 |
| **63** | H | Cl | H | H | H | OCH2 | CO | 6.537 | 5.185 |
| **64** | H | Cl | H | H | H | NHCH2 | CO | 18.080 | 4.743 |
| **65** | H | CN | H | H | 2-MeBnz | O | CO | 1.182 | 5.927 |
| **66** | H | CN | H | H | 2-CF3Bnz | O | CO | 0.505 | 6.297 |
| **67** | H | CN | H | H | Et | O | CO | 1.375 | 5.862 |
| **68** | H | CN | H | H | i-Pr | O | CO | 0.613 | 6.213 |
| **69** | H | CN | H | H | t-But | O | CO | 0.132 | 6.879 |
| **70** | H | CN | H | H | CH(CF3)2 | O | CO | 0.094 | 7.027 |
| **71** | H | CN | H | H | C(Me)2CF3 | O | CO | 0.051 | 7.292 |
| **72** | H | CN | H | H | C(CF3)2Me | O | CO | 0.044 | 7.357 |
| **73** | H | CN | H | H | C(CF3)3 | O | CO | 0.151 | 6.821 |
| **74** | H | H | H | H | Ph | O | CH2 | 75.900 | 4.120 |
| **75** | H | CN | H | H | i-Pr | O | CH2 | 0.890 | 6.051 |
| **76** | H | CN | H | H | C(CF3)2Me | O | CH2 | 0.151 | 6.821 |
| **77** | H | CN | H | i-Pr | 2-i-PrPh-(2-Pyr) | CH | CONHCH2 | 0.019 | 7.721 |
| **78** | H | CN | H | H | c-Pr | O | CO | 0.474 | 6.324 |
| **79** | H | CN | H | H | c-Pent | O | CO | 0.280 | 6.553 |
| **80** | H | CN | H | H | c-Hex | O | CO | 0.146 | 6.836 |
| **81** | H | CN | H | H | c-Hept | O | CO | 0.092 | 7.036 |
| **82** | H | CN | H | H | 4-MeBicyclo[3.2.2]Nonyl | O | CO | 0.072 | 7.143 |
| **83** | H | CN | H | H | Tetrahydroonapthyl | O | CO | 0.115 | 6.939 |
| **84** | H | CN | H | H | pyran | O | CO | 1.253 | 5.902 |
| **85** | H | CN | H | i-Pr | 2-O-i-ButPh-(2-Pyr) | CH | CONHCH2 | 0.031 | 7.509 |
| **86** | H | CN | H | H | Piperidine-N-Boc | O | CO | 0.492 | 6.308 |
| **87** | H | CN | H | Me | Piperidine-N-Boc | CH2 | CO | 1.094 | 5.961 |
| **88** | H | CN | H | Me | Piperidine-N-Boc | -- | CO | 0.757 | 6.121 |
| **89** | H | CN | H | Me | Piperazine-N-Boc | -- | CO | 0.064 | 7.194 |
| **90** | H | CN | H | Me | Piperidine-N-Boc | O | CO | 0.091 | 7.041 |
| **91** | H | CN | H | Me | Piperidine-N-COOMe | O | CO | 0.382 | 6.418 |
| **92** | H | CN | H | Me | Piperidine-N-COOEt | O | CO | 0.254 | 6.595 |
| **93** | H | CN | H | Me | Piperidine-N-COO-i-Pr | O | CO | 0.160 | 6.796 |
| **94** | H | CN | H | Me | Piperidine-N-COOCH2-t-But | O | CO | 0.111 | 6.955 |
| **95** | H | CN | H | Me | Piperidine-N-COOC(Me)­2Et | O | CO | 0.094 | 7.027 |
| **96** | H | CN | H | Me | Piperidine-N-COOPh | O | CO | 0.221 | 6.656 |
| **97** | H | CN | H | Me | Piperidine-N-COOBnz | O | CO | 0.130 | 6.886 |
| **98** | H | CN | H | Me | Piperidine-N-CH2COO-t-But | O | CO | 0.181 | 6.742 |
| **99** | H | CN | H | Me | Piperidine-N-(CH2)2-t-But | O | CO | 0.228 | 6.642 |
| **100** | H | CN | H | Me | Piperidine-N-COCH2-t-But | O | CO | 0.370 | 6.432 |
| **101** | H | CN | H | Me | Piperidine-N-CON-t-But | O | CO | 1.301 | 5.886 |
| **102** | H | CN | H | Me | Piperidine-N-SO2-n-But | O | CO | 0.207 | 6.684 |
| **103** | H | CN | H | Me | Piperidine-N-SO2Ph | O | CO | 0.336 | 6.474 |
| **104** | H | CN | H | Me | Piperidine-N-SO2Bnz | O | CO | 0.169 | 6.772 |
| **105** | H | CN | H | Me | p-CF3Ph | N | (CH2)3 | 0.975 | 6.011 |
| **106** | H | CN | H | Me | p-CF3Ph | N | CCCH2 | 2.172 | 5.663 |
| **107** | H | CN | H | Me | p-CF3Ph | N | CO(CH2)2 | 2.053 | 5.688 |
| **108** | H | CN | H | Me | p-CF3Ph | N | CH2COCH2 | 5.741 | 5.241 |
| **109** | H | CN | H | Me | p-CF3Ph | N | CO | 4.029 | 5.395 |
| **110** | H | CN | H | Me | p-CF3Ph | N | OCH2 | 4.554 | 5.342 |
| **111** | H | CN | H | Me | p-CF3Ph | N | C(OH)(CH2)2 | 2.249 | 5.648 |
| **112** | H | CN | H | Me | p-CF3Ph | N | CH2C(OH)CH2 | 0.874 | 6.058 |
| **113** | H | CN | H | Me | p-CF3Ph | N | CH2C(OMe)CH2 | 8.940 | 5.049 |
| **114** | H | CN | H | Me | p-CF3Ph | N | NHCH2C(OH)CH2 | 18.760 | 4.727 |
| **115** | H | CN | H | Me | p-CF3Ph | N | 2-OxoPyrrolid | 2.742 | 5.562 |
| **116** | H | CN | H | Me | p-CF3Ph | CH | CONH(CH2)2 | 11.600 | 4.936 |
| **117** | H | CN | H | Me | p-CF3Ph | CH | CONHCH2 | 0.300 | 6.523 |
| **118** | H | CN | H | Me | p-CF3Ph | CH | CON(Me)CH2 | 2.612 | 5.583 |
| **119** | H | CN | H | c-Pr | p-CF3-(2-Pyr) | CH | CONHCH2 | 0.243 | 6.614 |
| **120** | H | CN | H | CF3 | p-CF3-(2-Pyr) | CH | CONHCH2 | 3.186 | 5.497 |
| **121** | H | CN | H | t-But | p-CF3-(2-Pyr) | CH | CONHCH2 | 0.198 | 6.703 |
| **122** | H | CN | H | C(=CH­2)Me | p-CF3-(2-Pyr) | CH | CONHCH2 | 0.131 | 6.883 |
| **123** | H | CN | H | i-Pr | p-CF3-(2-Pyr) | CH | CONHCH2 | 0.040 | 7.398 |
| **124** | H | CN | H | i-Pr | 2-Pyr | CH | CONHCH2 | 0.114 | 6.943 |
| **125** | H | CN | H | i-Pr | 3-CF3-(2-Pyr) | CH | CONHCH2 | 0.037 | 7.432 |
| **126** | H | CN | H | i-Pr | 3-OMe-(2-Pyr) | CH | CONHCH2 | 0.110 | 6.959 |
| **127** | H | CN | H | i-Pr | 5-CF3-(2-Pyr) | CH | CONHCH2 | 0.061 | 7.215 |
| **128** | H | CN | H | i-Pr | 4-COOMe-(2-Pyr) | CH | CONHCH2 | 0.114 | 6.943 |
| **129** | H | CN | H | i-Pr | 3-COOMe-(2-Pyr) | CH | CONHCH2 | 0.306 | 6.514 |
| **130** | H | CN | H | i-Pr | 4-Br-(2-Pyr) | CH | CONHCH2 | 0.223 | 6.652 |
| **131** | H | CN | H | i-Pr | 4-Vinyl-(2-Pyr) | CH | CONHCH2 | 0.229 | 6.640 |
| **132** | H | CN | H | i-Pr | 4-Ph-(2-Pyr) | CH | CONHCH2 | 0.043 | 7.367 |
| **133** | H | CN | H | i-Pr | 4-MePh-(2-Pyr) | CH | CONHCH2 | 0.048 | 7.319 |
| **134** | H | CN | H | i-Pr | 3-MePh-(2-Pyr) | CH | CONHCH2 | 0.039 | 7.409 |
| **135** | H | CN | H | i-Pr | 3-Cl,5-OMePh-(2-Pyr) | CH | CONHCH2 | 0.047 | 7.328 |
| **136** | H | CN | H | i-Pr | 2-OMe,3-i-Pr,4-FPh-(2-Pyr) | CH | CONHCH2 | 0.024 | 7.620 |
| **137** | H | CN | H | i-Pr | 2-O-i-Pr,5-MePh-(2-Pyr) | CH | CONHCH2 | 0.022 | 7.658 |
| **138** | H | CN | H | i-Pr | 2-O-i-Pr,5-CF3Ph-(2-Pyr) | CH | CONHCH2 | 0.028 | 7.553 |
| **139** | H | CN | H | i-Pr | 2-OBnz,5-CF3Ph-(2-Pyr) | CH | CONHCH2 | 0.413 | 6.384 |
| **140** | H | CN | H | i-Pr | 2-O-i-PrPh-(2-Pyr) | CH | CONHCH2 | 0.029 | 7.538 |

a Compound number.

**Supplementary Table S2A.** Experimental inhibitory activity and activity scale (assigned and estimated) of external set molecules (set 1) using hypothesis 1 against CETP.

| **Compound number** | **Experimental inhibitory activity** | **Activity scale** | **Estimated scale** | **Fit value** |
| --- | --- | --- | --- | --- |
| **1** | 13000 | p | p | 5.548 |
| **9** | 7500 | p | p | 5.586 |
| **15** | 2900 | p | ppp | 7.212 |
| **24** | 270 | pp | pp | 6.502 |
| **25** | 570 | pp | p | 5.783 |
| **27** | 62 | ppp | p | 5.695 |
| **29** | 86 | ppp | ppp | 7.135 |
| **30** | 59 | ppp | p | 5.650 |
| **31** | 46 | ppp | p | 5.670 |
| **34** | 110 | pp | pp | 6.036 |
| **35** | 31 | ppp | ppp | 7.072 |
| **38** | 210 | pp | pp | 6.029 |
| **40** | 94 | ppp | p | 5.905 |
| **42** | 160 | pp | pp | 6.557 |
| **43** | 440 | pp | p | 5.695 |
| **45** | 19310 | p | p | 4.870 |
| **50** | 2150 | p | p | 5.996 |
| **51** | 4396 | p | pp | 6.334 |
| **52** | 1773 | p | p | 4.942 |
| **54** | 1253 | p | ppp | 7.043 |
| **54** | 1994 | p | pp | 6.146 |
| **55** | 12880 | p | p | 5.854 |
| **56** | 26490 | p | pp | 6.784 |
| **59** | 1774 | p | pp | 6.128 |
| **61** | 2206 | p | p | 5.397 |
| **62** | 8132 | p | p | 4.867 |
| **63** | 6537 | p | p | 4.847 |
| **64** | 18080 | p | pp | 6.017 |
| **65** | 1182 | p | ppp | 7.291 |
| **69** | 132 | pp | ppp | 7.074 |
| **73** | 151 | pp | ppp | 7.420 |
| **75** | 890 | pp | p | 4.280 |
| **77** | 19 | ppp | ppp | 7.065 |
| **78** | 474 | pp | pp | 6.627 |
| **79** | 280 | pp | ppp | 7.594 |
| **80** | 146 | pp | p | 5.891 |
| **86** | 492 | pp | pp | 6.803 |
| **87** | 1094 | p | ppp | 7.518 |
| **90** | 91 | ppp | p | 5.722 |
| **92** | 254 | pp | p | 5.403 |
| **93** | 160 | pp | pp | 6.770 |
| **95** | 94 | ppp | ppp | 7.028 |
| **97** | 130 | pp | ppp | 7.625 |
| **100** | 370 | pp | p | 5.715 |
| **103** | 336 | pp | ppp | 7.370 |
| **106** | 2172 | p | p | 4.438 |
| **109** | 4029 | p | pp | 6.622 |
| **110** | 4554 | p | p | 5.265 |
| **112** | 874 | pp | pp | 6.525 |
| **113** | 8940 | p | p | 5.169 |
| **116** | 11600 | p | pp | 6.043 |
| **118** | 2612 | p | pp | 7.009 |
| **122** | 131 | pp | pp | 6.075 |
| **125** | 37 | ppp | ppp | 7.112 |
| **127** | 61 | ppp | ppp | 7.017 |
| **128** | 114 | pp | ppp | 7.176 |
| **129** | 306 | pp | ppp | 7.217 |
| **134** | 39 | ppp | pp | 6.993 |
| **135** | 47 | ppp | pp | 6.792 |
| **139** | 413 | pp | ppp | 7.299 |

CETP inhibitory activity scale: ppp, <100 nM (highly active); pp, >100-1000 nM (moderately active); p, >1000 nM (inactive).

**Supplementary Table S2B.** Experimental inhibitory activity and activity scale (assigned and estimated) of external set molecules (set 2) using hypothesis 1 against CETP.

| **Compound number** | **Experimental inhibitory activity** | **Activity scale** | **Estimated scale** | **Fit value** |
| --- | --- | --- | --- | --- |
| **2** | 1100.0 | p | p | 5.688 |
| **3** | 21000.0 | p | p | 5.799 |
| **4** | 23000.1 | p | p | 5.619 |
| **6** | 940.0 | pp | pp | 6.330 |
| **7** | 3200.0 | p | ppp | 7.052 |
| **8** | 1900.0 | p | p | 5.507 |
| **11** | 410.0 | pp | ppp | 7.330 |
| **12** | 5200.0 | p | p | 5.639 |
| **13** | 1300.0 | p | p | 5.814 |
| **16** | 1300.0 | p | ppp | 7.057 |
| **18** | 2800.0 | p | pp | 6.018 |
| **20** | 37999.7 | p | p | 5.794 |
| **21** | 1900.0 | p | pp | 6.189 |
| **22** | 510.0 | pp | p | 5.716 |
| **26** | 910.0 | pp | p | 5.603 |
| **32** | 44.0 | ppp | p | 5.713 |
| **36** | 200.0 | pp | pp | 6.031 |
| **37** | 58.0 | ppp | pp | 6.996 |
| **41** | 210.0 | pp | p | 5.869 |
| **46** | 4230.0 | p | p | 4.859 |
| **48** | 2700.0 | p | pp | 6.016 |
| **49** | 6390.0 | p | pp | 6.069 |
| **53** | 1248.0 | p | p | 4.867 |
| **58** | 6810.1 | p | p | 5.103 |
| **60** | 4570.0 | p | p | 5.572 |
| **66** | 505.0 | pp | ppp | 7.267 |
| **67** | 1375.0 | p | p | 5.882 |
| **68** | 613.0 | pp | ppp | 7.276 |
| **70** | 94.0 | ppp | ppp | 7.137 |
| **71** | 51.0 | ppp | ppp | 7.274 |
| **76** | 151.0 | pp | p | 4.729 |
| **81** | 92.0 | ppp | pp | 6.176 |
| **82** | 72.0 | ppp | p | 5.466 |
| **83** | 115.0 | pp | p | 5.363 |
| **85** | 31.0 | ppp | pp | 6.113 |
| **88** | 757.0 | pp | ppp | 7.482 |
| **91** | 382.0 | pp | pp | 6.181 |
| **94** | 111.0 | pp | p | 5.781 |
| **96** | 221.0 | pp | p | 5.731 |
| **98** | 181.0 | pp | p | 5.470 |
| **99** | 228.0 | pp | p | 5.438 |
| **104** | 169.0 | pp | ppp | 7.188 |
| **105** | 975.0 | pp | p | 5.353 |
| **107** | 2053.0 | p | pp | 6.584 |
| **108** | 5741.0 | p | ppp | 7.196 |
| **114** | 18759.9 | p | p | 5.246 |
| **115** | 2742.0 | p | ppp | 7.032 |
| **117** | 300.0 | pp | ppp | 7.243 |
| **119** | 243.0 | pp | ppp | 7.217 |
| **120** | 3186.0 | p | pp | 6.725 |
| **121** | 198.0 | pp | ppp | 7.367 |
| **124** | 114.0 | pp | ppp | 7.122 |
| **126** | 110.0 | pp | ppp | 7.206 |
| **130** | 223.0 | pp | pp | 6.798 |
| **131** | 229.0 | pp | pp | 6.510 |
| **133** | 48.0 | ppp | pp | 6.985 |
| **136** | 24.0 | ppp | pp | 6.966 |
| **137** | 22.0 | ppp | pp | 6.894 |
| **138** | 28.0 | ppp | ppp | 7.175 |
| **140** | 29.0 | ppp | ppp | 7.121 |

CETP inhibitory activity scale: ppp, <100 nM (highly active); pp, >100-1000 nM (moderately active); p, >1000 nM (inactive).


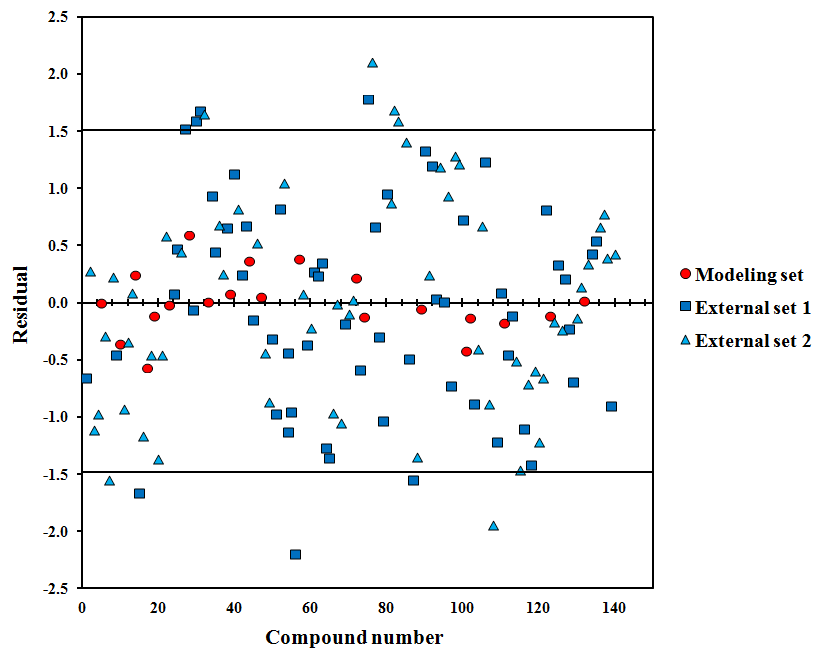


**Supplementary Figure F1.** Domain of applicability:Residual activity *vs* compound number plot of the modeling set and two external set (set 1 and 2) compounds. Red circle: Modeling compounds; Blue square: External set 1 compounds; Light blue triangle: External set 2 compounds.

**
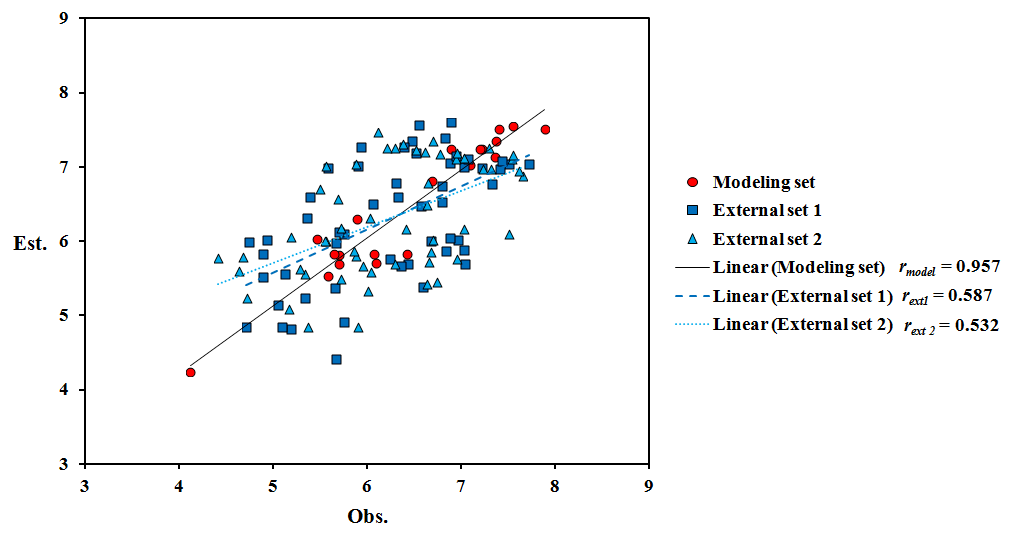
**

**Supplementary Figure F2.** Observed (Obs.) *vs* Estimated (Est.) activity plots for the modeling set and two external set (set 1 and 2) compounds. Red circle: Modeling compounds; Blue square: External set 1 compounds; Light blue triangle: External set 2 compounds.

**
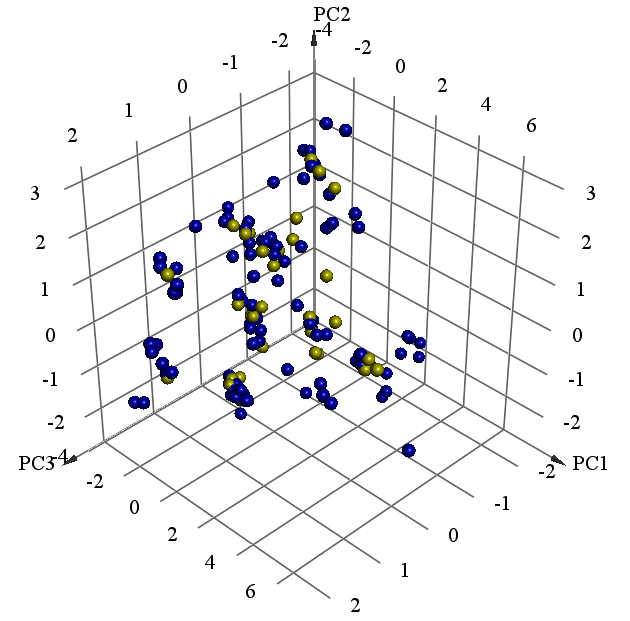
**

**Supplementary Figure F3.** Three-dimensional principal component analysis (PCA) plot to justify uniformity of the test set and training set compounds. Blue Box: Training set compounds; Red Box: Test set compounds.

| | 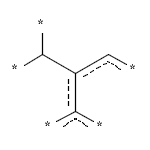 | | --- | | G1: 1335340087 17 out of 17 good Bayesian Score: 0.529 | | | 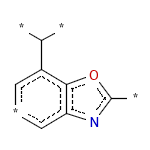 | | --- | | G2: -1900138962 17 out of 17 good Bayesian Score: 0.529 | | | 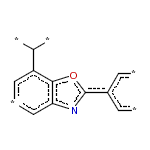 | | --- | | G3: 478776302 17 out of 17 good Bayesian Score: 0.529 | | | 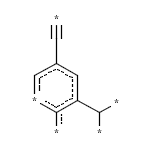 | | --- | | G4: -816015300 16 out of 16 good Bayesian Score: 0.527 | | | 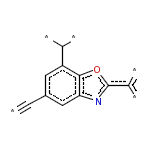 | | --- | | G5: -1192377395 16 out of 16 good Bayesian Score: 0.527 | |
| --- | --- | --- | --- | --- | --- | --- | --- | --- | --- | --- | --- | --- | --- | --- |
| | 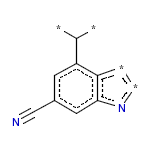 | | --- | | G6: 1249777739 16 out of 16 good Bayesian Score: 0.527 | | | 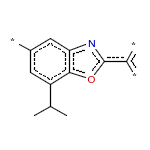 | | --- | | G7: 1091272046 15 out of 15 good Bayesian Score: 0.524 | | | 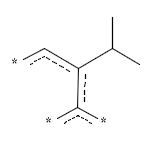 | | --- | | G8: -732925745 15 out of 15 good Bayesian Score: 0.524 | | | 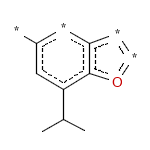 | | --- | | G9: 161259555 15 out of 15 good Bayesian Score: 0.524 | | | 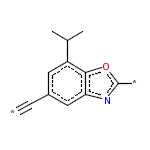 | | --- | | G10: -1391419750 15 out of 15 good Bayesian Score: 0.524 | |
| | 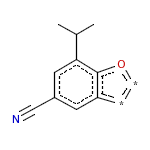 | | --- | | G11: 354222493 15 out of 15 good Bayesian Score: 0.524 | | | 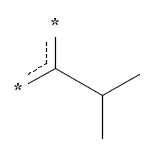 | | --- | | G12: 733491677 15 out of 15 good Bayesian Score: 0.524 | | | 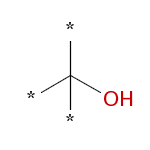 | | --- | | G13: 2025123907 10 out of 10 good Bayesian Score: 0.504 | | | 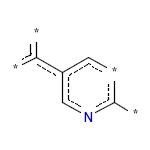 | | --- | | G14: -276017898 9 out of 9 good Bayesian Score: 0.497 | | | 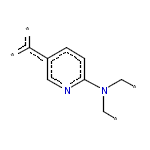 | | --- | | G15: 1713037459 9 out of 9 good Bayesian Score: 0.497 | |
| | 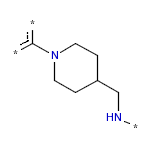 | | --- | | G16: -300544019 18 out of 19 good Bayesian Score: 0.482 | | | 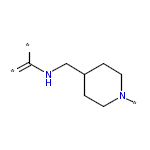 | | --- | | G17: -2046305099 18 out of 19 good Bayesian Score: 0.482 | | | 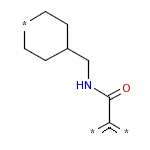 | | --- | | G18: -984322507 18 out of 19 good Bayesian Score: 0.482 | | | 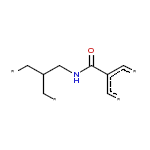 | | --- | | G19: -632795450 18 out of 19 good Bayesian Score: 0.482 | | | 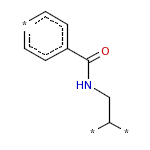 | | --- | | G20: 2014505765 18 out of 19 good Bayesian Score: 0.482 | |

**Supplementary Figure F4.** Good (G1-G20) molecular fingerprints for CETP inhibitors as identified by *ECFP_6* fingerprint descriptor.

| | 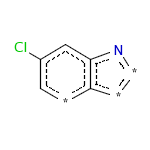 | | --- | | B1: -3028773 0 out of 16 good Bayesian Score: -2.306 | | | 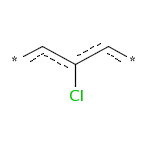 | | --- | | B2: -176494269 0 out of 16 good Bayesian Score: -2.306 | | | 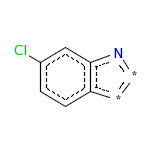 | | --- | | B3: -1025141132 0 out of 15 good Bayesian Score: -2.248 | | | 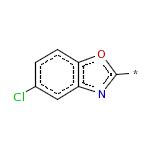 | | --- | | B4: 30030456 0 out of 15 good Bayesian Score: -2.248 | | | 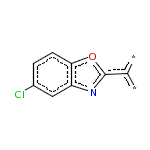 | | --- | | B5: -150087964 0 out of 15 good Bayesian Score: -2.248 | |
| --- | --- | --- | --- | --- | --- | --- | --- | --- | --- | --- | --- | --- | --- | --- |
| | 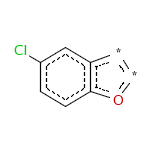 | | --- | | B6: 1346241644 0 out of 15 good Bayesian Score: -2.248 | | | 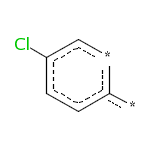 | | --- | | B7: 1854732111 0 out of 15 good Bayesian Score: -2.248 | | | 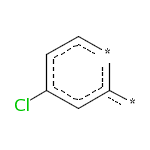 | | --- | | B8: 577592657 0 out of 15 good Bayesian Score: -2.248 | | | 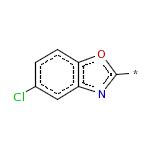 | | --- | | B9: -444352890 0 out of 15 good Bayesian Score: -2.248 | | | 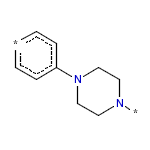 | | --- | | B10: -793949333 0 out of 9 good Bayesian Score: -1.805 | |
| | 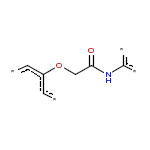 | | --- | | B11: 1458946345 0 out of 9 good Bayesian Score: -1.805 | | | 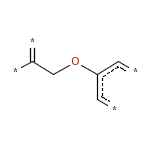 | | --- | | B12: 1708805596 0 out of 9 good Bayesian Score: -1.805 | | | 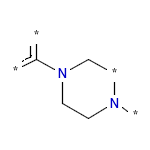 | | --- | | B13: 342267039 0 out of 9 good Bayesian Score: -1.805 | | | 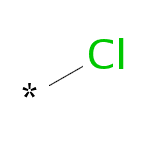 | | --- | | B14: -817402818 1 out of 18 good Bayesian Score: -1.720 | | | 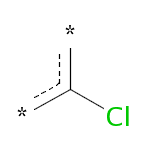 | | --- | | B15: 99947387 1 out of 18 good Bayesian Score: -1.720 | |
| | 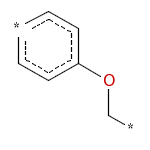 | | --- | | B16: 523172742 0 out of 7 good Bayesian Score: -1.600 | | | 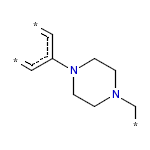 | | --- | | B17: 102821781 0 out of 7 good Bayesian Score: -1.600 | | | 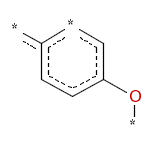 | | --- | | B18: 425403071 0 out of 6 good Bayesian Score: -1.479 | | | 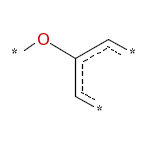 | | --- | | B19: -176455838 1 out of 13 good Bayesian Score: -1.428 | | | 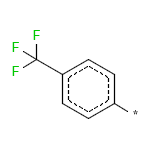 | | --- | | B20: -1809812284 1 out of 13 good Bayesian Score: -1.428 | |

**Supplementary Figure F5.** Bad (B1-B20) molecular fingerprints for CETP inhibitors as identified by *ECFP_6* fingerprint descriptor.
